# Supplementary material for: Shape-controlled synthesis of micro-/nanosized Cu particles with spherical and polyhedral shapes using the polyol process
Source: Royal Society of Chemistry journal article supplement (doi:10.1039/d4ra03643c), 2024-01-01
Supplement: d4ra03643c1.pdf [file d4ra03643c1.pdf]

## Electronic supplementary information (ESI)

### Shape-controlled synthesis of micro/nanosized copper particles with spherical and polyhedral shapes by the polyol process

Nguyen Thi Nhat Hang<sup>a</sup>, Yong Yang<sup>b</sup>, Le Hong Phuc<sup>c</sup>, Nguyen Huu Tri<sup>d</sup>, Ho Van Cuu<sup>d</sup>, Nguyen Viet Long<sup>\*d</sup>

<sup>a</sup>Institute of Applied Technology, Thu Dau Mot University, 6 Tran Van On, Phu Hoa Ward, Thu Dau Mot City 820000, Vietnam.

<sup>b</sup>State Key Laboratory of High-Performance Ceramics and Superfine Microstructures, Shanghai Institute of Ceramics, Chinese Academy of Sciences, 1295 Dingxi Road, Shanghai, 200050, China

<sup>c</sup>National Institute of Applied Mechanics and Informatics, Vietnam Academy of Science and Technology, 291 Dien Bien Phu, Ho Chi Minh City, 700000, Vietnam.

<sup>d</sup>Department of Electronics and Telecommunications, Saigon University, 273 An Duong Vuong, District 5, Ho Chi Minh City 700000, Vietnam.

<sup>+</sup>Email: nguyenvietlong@sgu.edu.vn

**Abstract.** In our present study, the synthesis of Cu micro/nanosized particles by the polyol process. Cu micro/nanosized particles are synthesized by reducing copper (II) chloride in ethylene glycol (EG), polyvinylpyrrolidone (PVP), and potassium bromide (KBr) at low temperature with or without the use of sodium borohydride.

**Keywords.** the polyol process; the polyol technology; Cu; CuO; plasmon band

## Electronic supplementary information (ESI)

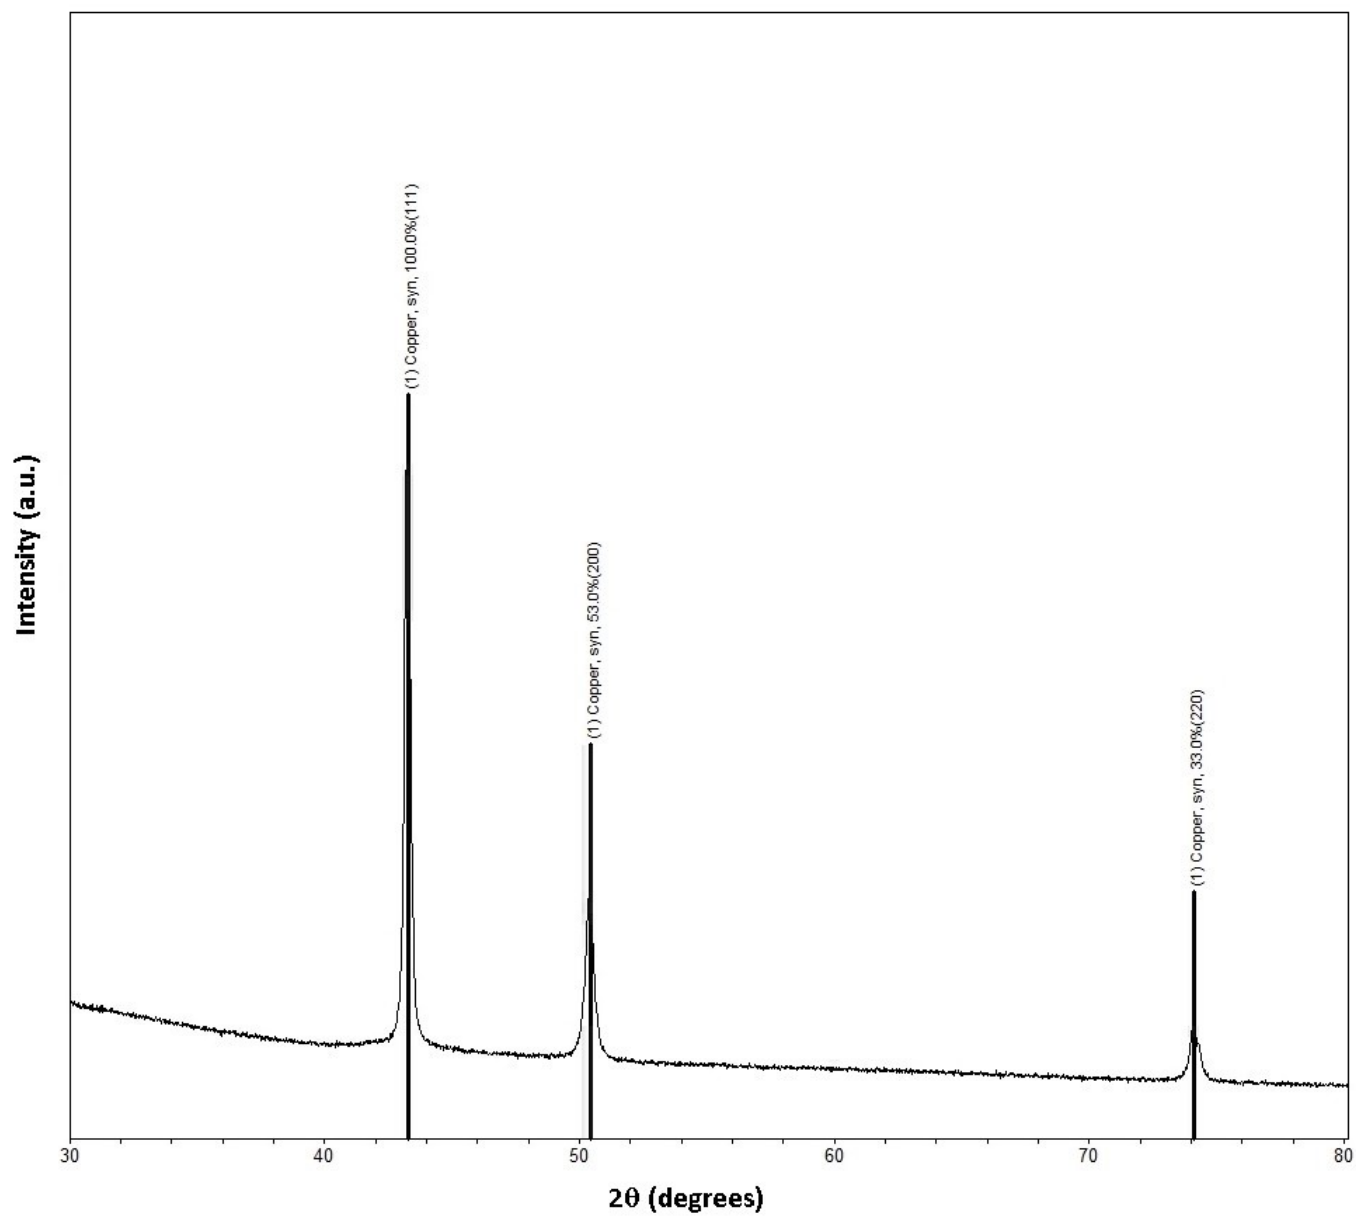

**Fig. 1.** (c) Nanosized Cu particles less than 100 nm by XRD (Rigaku D/max 2550V) (Sample 1).

## Electronic supplementary information (ESI)

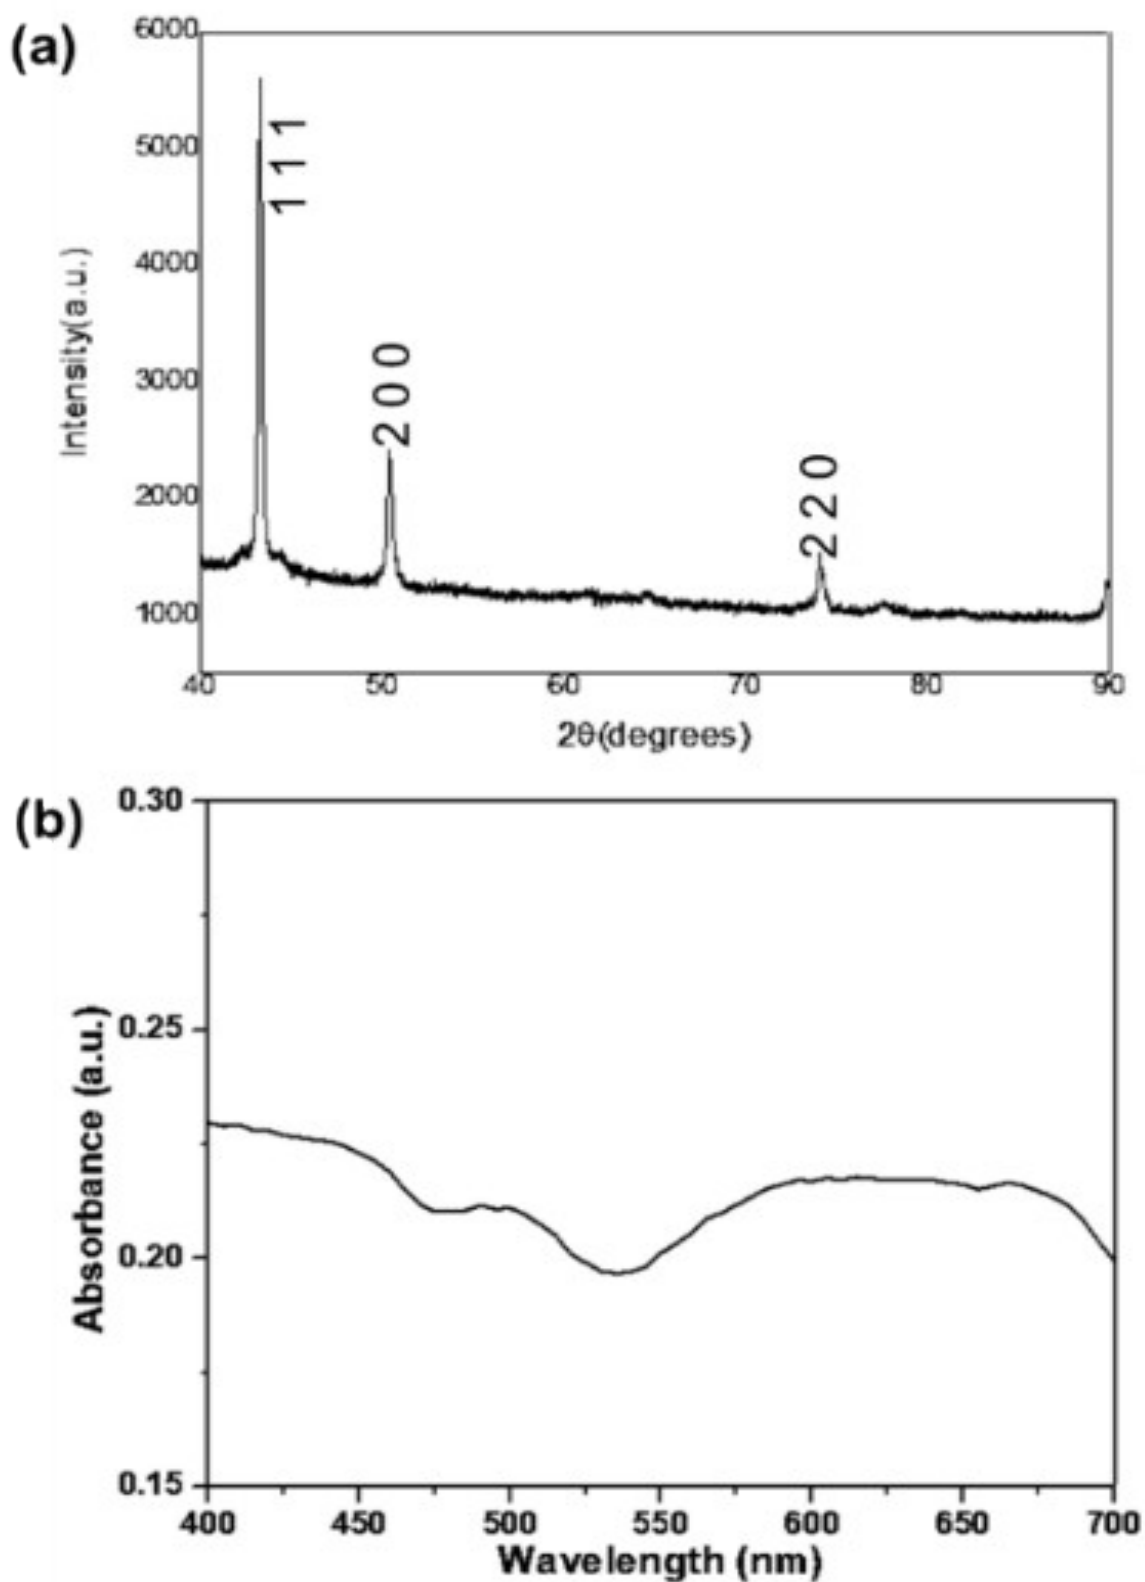

**Fig. 2.** (a) Micro/nanosized Cu particles (Sample 2) by XRD (Panalytical X'PERT PRO, The Netherlands), and (b) UV-vis measurements (EMC-NANO-UV Spectrophotometer).

## **Electronic supplementary information (ESI)**

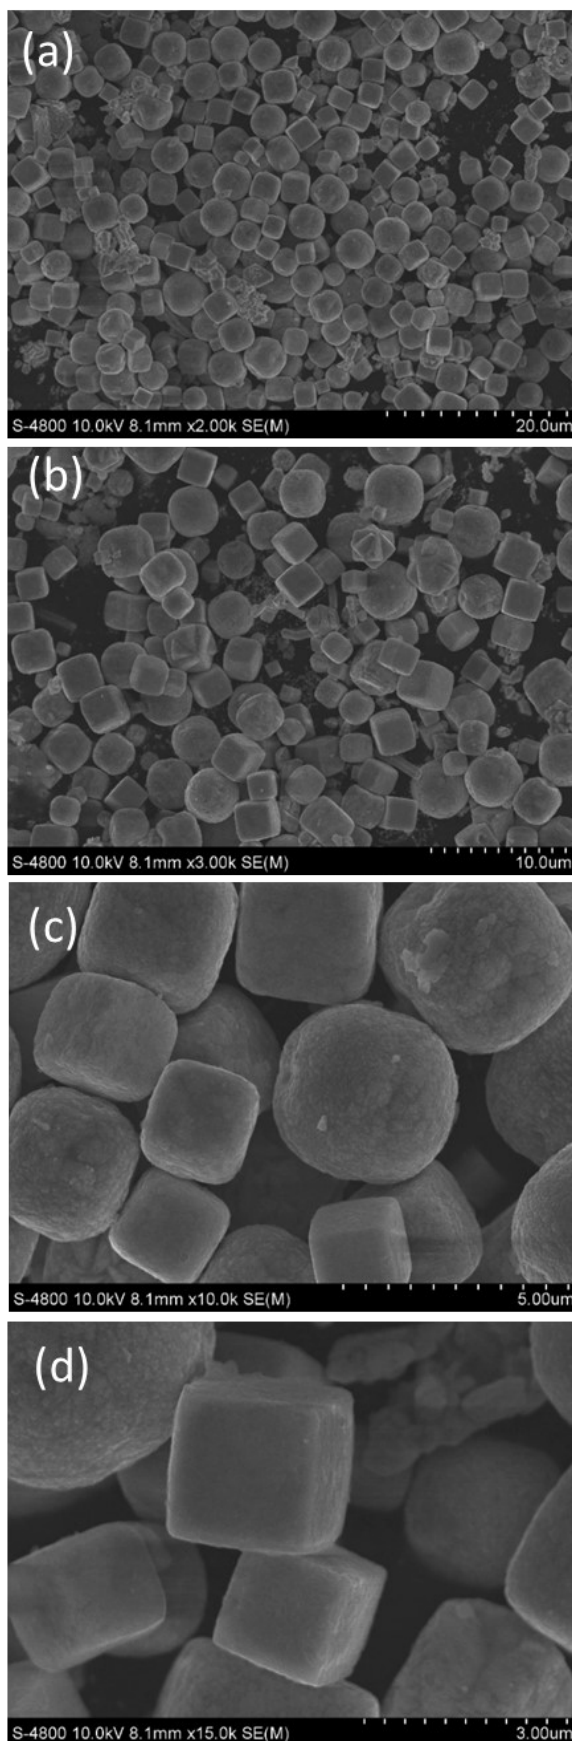

**Fig. 3.** Micro/nanosized Cu particles by SEM (S-4800). Scale bars: (a) 20  $\mu\text{m}$  (Sample 2). (b) 10  $\mu\text{m}$  (Sample 3). (c) 5  $\mu\text{m}$ , and (d) 3  $\mu\text{m}$  (Sample 2). The size and shape are appropriately evaluated.

## Electronic supplementary information (ESI)

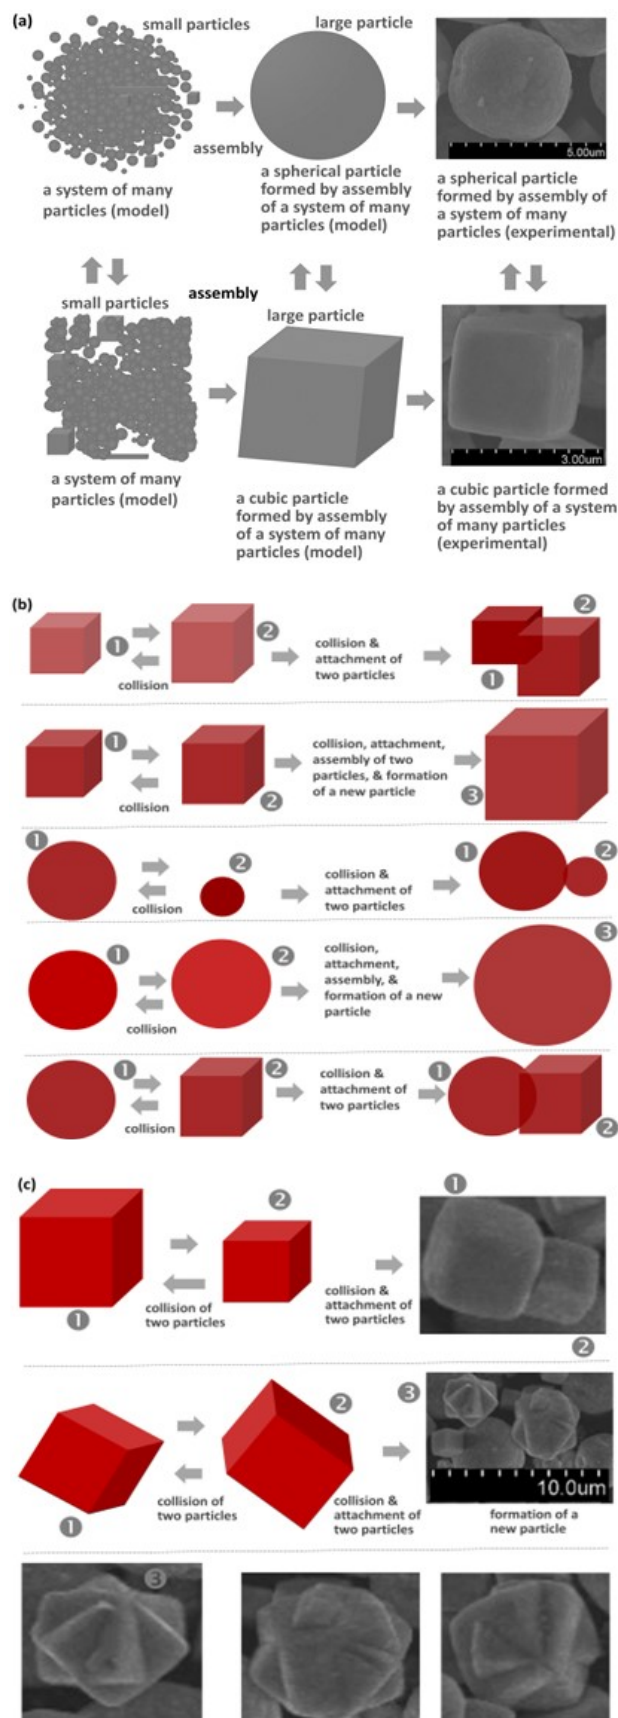

**Fig. 4.** Models: (a) Formation of various spherical and cubic particles by assembly. (b) Attachment. (c) Collision, attachment, and formation of two cubic particles of a new large particle according to experimental evidences in colloidal synthesis. (1) and (2) label the as-prepared particles with cubic or spherical shape. (3) a new particle (about 3-4 μm).

## Electronic supplementary information (ESI)

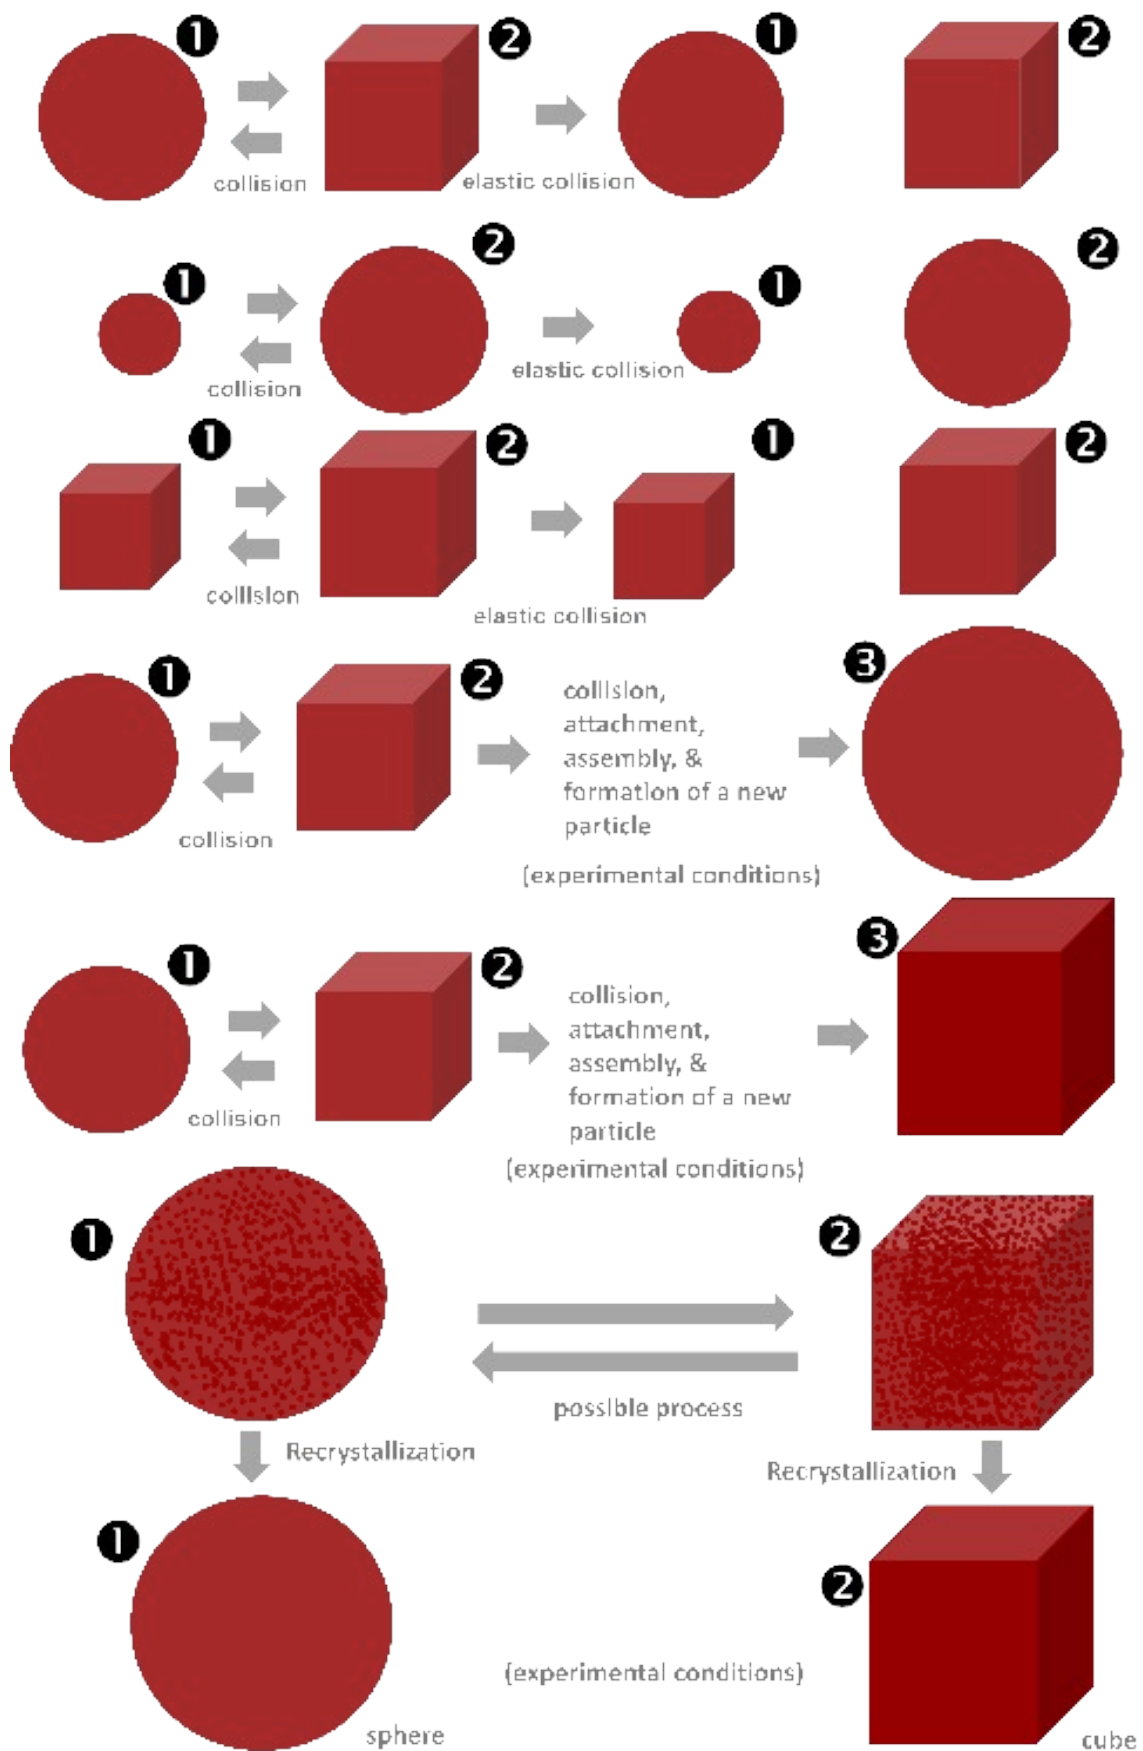

**Fig. 5.** Model of formation of large spherical and cubic particles by assembly. Label: (1) spherical particle; (2) cubic particle; (3) a formation of a new particle with spherical or cubic shape.
